# Supplementary material for: Origins of a cyanobacterial 6-phosphogluconate dehydrogenase in plastid-lacking eukaryotes
Source: PubMed Central journal article supplement (PMC2416651; doi:10.1186/1471-2148-8-151), 2008-05-17
Supplement: 1471-2148-8-151-S2.pdf [file 1471-2148-8-151-S2.pdf]

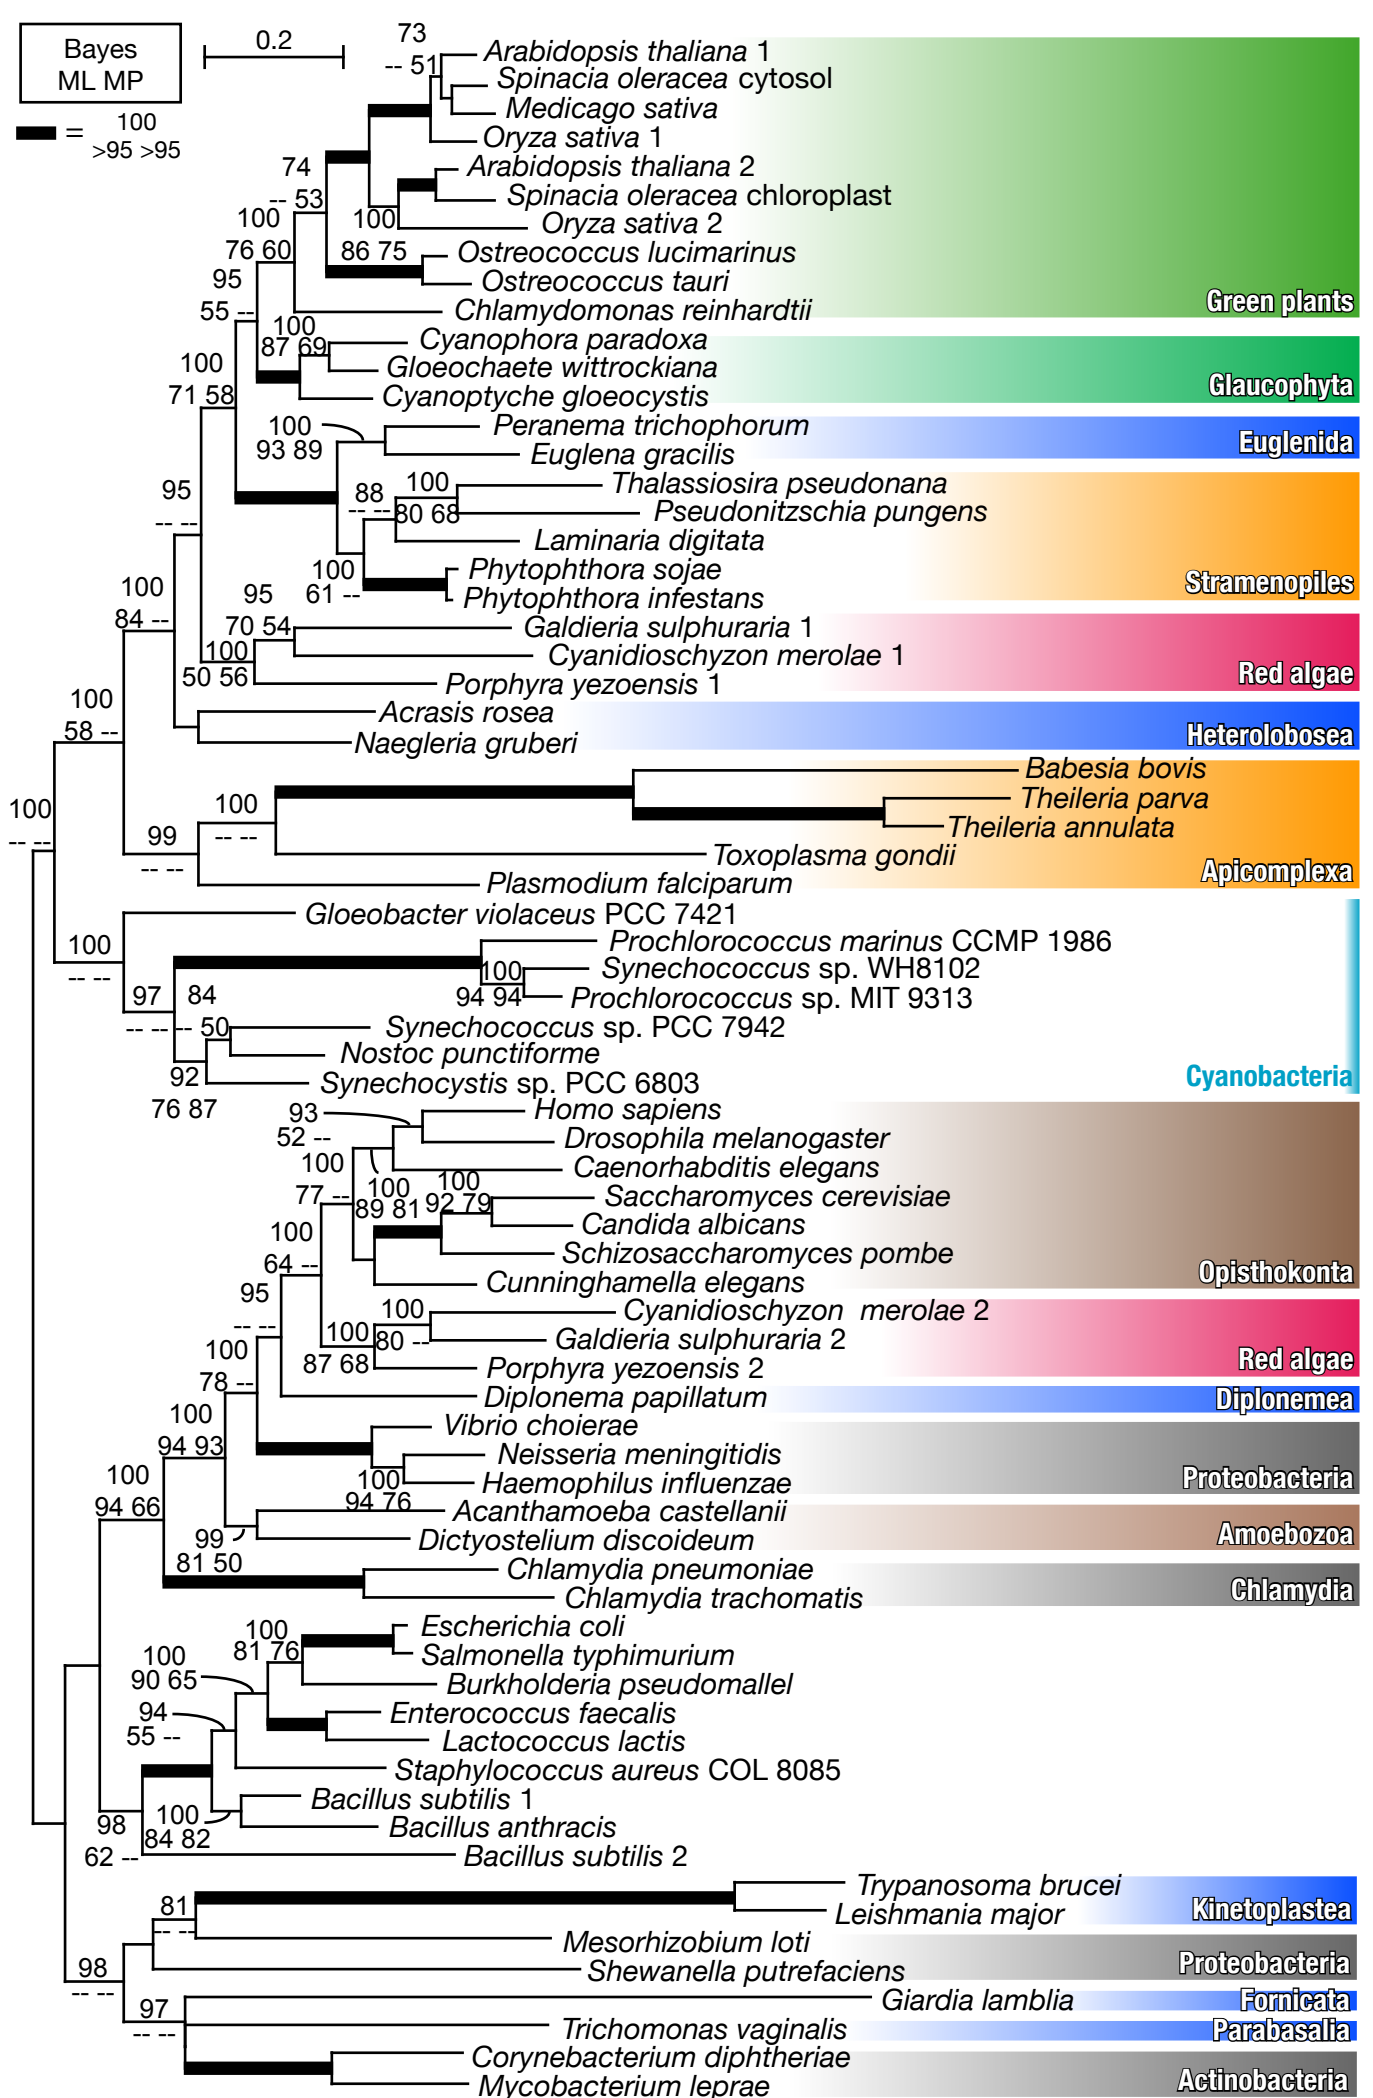

Additional file 2

Figure 4. MrBayes consensus tree of *gnd* genes, constructed with 437 amino acid sites from 72 taxa.

Maruyama et al. **Origins of a cyanobacterial 6-phosphogluconate dehydrogenase in plastid-lacking eukaryotes**
