# Supplementary material for: Origins of a cyanobacterial 6-phosphogluconate dehydrogenase in plastid-lacking eukaryotes
Source: PubMed Central journal article supplement (PMC2416651; doi:10.1186/1471-2148-8-151), 2008-05-17
Supplement: 1471-2148-8-151-S3.pdf [file 1471-2148-8-151-S3.pdf]

|                             | EW |   |   |   |   |   |   |   |   |   |   |   |   |   |   |   |   |   |   |
|-----------------------------|----|---|---|---|---|---|---|---|---|---|---|---|---|---|---|---|---|---|---|
| <i>Arabidopsis 1</i>        | D  | C | I | V | D | G | G | N | E | W | Y | E | N | T | E | R | R | E | E |
| <i>Medicago</i>             | D  | C | I | I | D | G | D | N | E | W | Y | E | N | T | E | R | R | E | E |
| <i>Spinacia cytosol</i>     | D  | C | I | I | D | G | G | N | E | W | Y | E | N | T | E | R | R | E | E |
| <i>Oryza 1</i>              | D  | C | I | I | D | G | G | N | E | W | Y | E | N | T | E | R | R | E | E |
| <i>Arabidopsis 2</i>        | D  | C | I | I | D | G | G | N | E | W | Y | Q | N | T | E | R | R | I | I |
| <i>Spinacia chloroplast</i> | D  | T | I | I | D | G | G | N | E | W | Y | Q | N | T | E | R | R | L | L |
| <i>Oryza 2</i>              | D  | A | I | V | D | G | G | N | E | W | Y | Q | N | T | E | R | R | I | I |
| <i>Ostreococcus tauri</i>   | D  | C | I | I | D | G | G | N | E | W | Y | E | N | T | E | R | R | A | A |
| <i>Ostreococcus luc.</i>    | D  | C | I | I | D | G | G | N | E | W | Y | E | N | T | E | R | R | S | S |
| <i>Chlamydomonas</i>        | D  | I | I | I | D | G | G | N | E | W | Y | E | N | T | E | K | R | M | M |
| <i>Gloeochaete</i>          | D  | L | I | I | D | G | G | N | E | W | Y | K | N | T | E | R | R | G | G |
| <i>Cyanophora</i>           | D  | L | I | I | D | G | G | N | E | W | Y | E | N | T | E | R | R | A | A |
| <i>Cyanoptyche</i>          | D  | I | I | I | D | G | G | N | E | W | Y | L | N | T | E | R | R | A | A |
| <i>Euglena</i>              | D  | L | I | V | D | G | G | N | E | W | F | P | N | S | Q | R | R | A | A |
| <i>Peranema</i>             | D  | L | L | I | D | G | G | N | E | W | F | P | N | T | L | R | R | A | A |
| <i>Phytophthora inf.</i>    | D  | I | I | V | D | G | G | N | E | W | F | P | N | S | V | R | R | A | A |
| <i>Phytophthora sojae</i>   | D  | I | I | V | D | G | G | N | E | W | F | P | N | S | V | R | R | A | A |
| <i>Laminaria</i>            | D  | I | L | V | D | G | G | N | E | W | F | P | N | S | Q | R | R | A | A |
| <i>Pseudonitzschia</i>      | D  | I | L | V | D | G | G | N | E | W | F | P | N | S | V | R | R | S | S |
| <i>Thalassiosira</i>        | D  | V | I | V | D | G | G | N | E | W | F | Q | N | T | L | R | R | S | S |
| <i>Naegleria</i>            | D  | I | I | V | D | G | G | N | E | W | F | L | N | T | E | K | R | A | A |
| <i>Acrasis</i>              | D  | T | I | I | D | G | G | N | E | W | Y | E | N | T | N | K | R | A | A |
| <i>Cyanidioschyzon 1</i>    | D  | I | I | V | D | G | G | N | E | W | Y | E | N | T | E | R | R | A | A |
| <i>Galdieria 1</i>          | D  | L | I | V | D | G | G | N | E | W | Y | E | N | T | Q | R | R | A | A |
| <i>Plasmodium</i>           | D  | I | I | I | D | G | G | N | E | W | Y | I | N | S | E | R | R | I | I |
| <i>Toxoplasma</i>           | D  | C | L | V | D | A | G | N | E | F | F | E | V | S | E | K | R | E | E |
| <i>Theileria ann.</i>       | D  | L | V | V | D | G | G | N | E | W | Y | N | N | T | E | R | R | I | I |
| <i>Theileria par.</i>       | D  | M | V | I | D | G | G | N | E | W | Y | K | N | T | E | R | R | I | I |
| <i>Babesia</i>              | D  | I | V | I | D | G | G | N | E | W | Y | E | N | T | I | G | R | I | I |
| <i>Synechocystis 6803</i>   | D  | L | I | I | D | G | G | N | S | L | F | T | D | T | E | R | R | V | V |
| <i>Nostoc</i>               | D  | I | I | I | D | G | G | N | S | W | F | E | D | T | E | R | R | T | T |
| <i>Synechococcus 7942</i>   | D  | M | I | I | D | G | G | N | S | L | Y | E | D | T | E | R | R | T | T |
| <i>Gloeobacter</i>          | D  | V | I | I | D | G | G | N | S | L | F | T | D | T | E | K | R | S | S |
| <i>Prochlorococcus 9313</i> | D  | L | L | I | D | G | G | N | S | E | F | R | D | T | E | R | R | V | V |
| <i>Synechococcus 8102</i>   | D  | L | L | I | D | G | G | N | S | D | Y | H | D | T | E | R | R | V | V |
| <i>Prochlorococcus 1986</i> | D  | L | L | I | D | G | G | N | S | Q | F | K | D | T | E | R | R | V | V |
| <i>Leishmania</i>           | D  | I | I | I | D | T | G | N | A | N | F | K | D | Q | D | K | R | A | A |
| <i>Trypanosoma</i>          | D  | I | L | V | D | T | G | N | A | H | F | K | D | Q | G | R | R | A | A |
| <i>Giardia</i>              | D  | I | I | I | D | S | G | N | S | Y | K | L | T | E | R | K | V | V | V |
| <i>Trichomonas</i>          | D  | V | I | I | D | G | G | N | S | H | W | P | D | T | E | R | R | Q | Q |
| <i>Galdieria 2</i>          | D  | L | I | V | D | G | G | N | S | H | F | L | D | T | R | R | R | T | T |
| <i>Cyanidioschyzon 2</i>    | D  | V | I | V | D | G | G | N | S | Y | Y | Q | D | S | T | R | R | M | M |
| <i>Haemophilus</i>          | D  | I | I | I | D | G | G | N | S | N | Y | P | D | T | N | R | R | V | V |
| <i>Neisseria</i>            | D  | I | I | I | D | G | G | N | A | N | Y | S | D | T | T | R | R | T | T |
| <i>Vibrio</i>               | D  | I | I | I | D | G | G | N | T | N | F | P | D | T | N | R | R | V | V |
| <i>Diplonema</i>            | D  | I | V | I | D | G | G | N | S | H | F | P | D | S | I | R | R | T | T |
| <i>Saccharomyces</i>        | D  | I | I | I | D | G | G | N | S | H | F | P | D | T | N | R | R | Y | Y |
| <i>Candida</i>              | D  | I | I | I | D | G | G | N | S | H | F | P | D | S | N | R | R | Y | Y |
| <i>Schizosaccharomyces</i>  | D  | I | I | V | D | G | G | N | S | H | Y | P | D | T | T | R | R | C | C |
| <i>Homo</i>                 | D  | I | I | I | D | G | G | N | S | E | Y | R | D | T | T | R | R | C | C |
| <i>Drosophila</i>           | D  | V | I | I | D | G | G | N | S | E | Y | Q | D | T | S | R | R | C | C |
| <i>Caenorhabditis</i>       | D  | I | I | I | D | G | G | N | S | E | Y | T | D | S | N | R | R | S | S |
| <i>Cunninghamella</i>       | D  | I | I | I | D | G | G | N | S | H | F | P | D | S | I | R | R | T | T |
| <i>Dictyostelium</i>        | D  | I | I | I | D | G | G | N | S | L | Y | T | D | S | D | R | R | T | T |
| <i>Acanthamoeba</i>         | D  | I | I | I | D | G | G | N | S | H | F | P | D | S | N | R | R | T | T |
| <i>Chlamydia tra.</i>       | D  | I | L | I | D | G | G | N | S | Y | L | D | S | E | Q | R | Y | Y | Y |
| <i>Chlamydia pne.</i>       | D  | V | I | I | D | G | G | N | S | Y | F | K | D | S | E | R | R | C | C |
| <i>Salmonella</i>           | D  | I | I | I | D | G | G | N | T | F | F | Q | D | T | I | R | R | N | N |
| <i>Escherichia</i>          | D  | I | I | I | D | G | G | N | T | F | F | Q | D | T | I | R | R | N | N |
| <i>Burkholderia</i>         | D  | V | L | I | D | G | G | N | T | H | F | T | D | T | I | R | R | N | N |
| <i>Lactococcus</i>          | D  | I | L | I | D | G | G | N | T | H | F | P | D | T | M | R | R | N | N |
| <i>Enterococcus</i>         | D  | I | L | I | D | G | G | N | T | F | F | K | D | T | M | R | R | N | N |
| <i>Bacillus ant.</i>        | D  | I | L | I | D | G | G | N | T | Y | F | V | D | T | I | R | R | N | N |
| <i>Bacillus sub. 1</i>      | D  | I | L | I | D | G | G | N | T | Y | Y | K | D | T | Q | R | R | N | N |
| <i>Staphylococcus</i>       | D  | I | L | I | D | G | G | N | T | Y | Q | D | T | I | R | R | N | N | N |
| <i>Bacillus sub. 2</i>      | D  | V | I | M | D | G | G | N | S | H | Y | E | D | T | E | R | R | Y | Y |
| <i>Mycobacterium</i>        | D  | I | I | I | D | G | G | N | S | L | F | T | D | T | I | R | R | E | E |
| <i>Corynebacterium</i>      | D  | I | I | I | D | G | G | N | A | L | Y | T | D | T | I | R | R | E | E |
| <i>Shewanella</i>           | D  | I | V | I | D | T | G | N | S | L | W | T | D | T | V | E | R | E | E |
| <i>Mesorhizobium</i>        | D  | I | V | I | D | A | G | N | A | N | F | R | D | T | M | R | R | F | F |

Additional file 3

Figure 5. A region of the amino acid sequence alignment encompassing the EW signature of gnd genes.

Maruyama et al. **Origins of a cyanobacterial 6-phosphogluconate dehydrogenase in plastid-lacking eukaryotes**
